# Supplementary material
Source: MDPI journal article supplement (https://www.mdpi.com/2673-1924/2/3/36)
Supplement: s1 [file s1]

**Table S1.** Species included in this study, their functional group, their occurrence (Y or N) at artificial and natural structures, and their habitat use. Artificial structures = soft coral mimic (SC), control structure (C), boulder coral mimic (BC) and elkhorn coral mimic (EC). Natural structures = sea rods (SR), dead corals (DC), infected diseased corals (IC), healthy corals (HC). Habitat use classification as generalist (General) or specialist (Special) from Alvarez-Filipe et al. 2015.

| Family             | Species                    | Functional Group | Natural |   |    |    | Artificial |    |    | Habitat |         |
|--------------------|----------------------------|------------------|---------|---|----|----|------------|----|----|---------|---------|
|                    |                            |                  | SC      | C | BC | EC | SR         | DC | IC | HC      | Use     |
| Acanthuridae       | Acanthurus bahianus        | Herbivore        | Y       | Y | Y  | Y  | Y          | Y  | Y  | Y       | General |
| Acanthuridae       | Acanthurus chirurgus       | Herbivore        | Y       | Y | Y  | Y  | Y          | Y  | Y  | Y       | General |
| Acanthuridae       | Acanthurus coeruleus       | Herbivore        | Y       | Y | Y  | Y  | Y          | Y  | Y  | Y       | General |
| Aulostomidae       | Aulostomus maculatus       | Predator         | N       | N | Y  | Y  | Y          | Y  | Y  | Y       | General |
| Balistidae         | Balistes capriscus         | Predator         | N       | N | N  | N  | N          | Y  | N  | Y       | General |
| Balistidae         | Balistes vetula            | Predator         | N       | N | Y  | N  | N          | Y  | N  | N       | General |
| Blenonidae         | Strongylura notata         | Predator         | Y       | N | N  | N  | N          | N  | N  | N       | Special |
| Carangidae         | Carangoides ruber          | Predator         | N       | N | Y  | Y  | Y          | Y  | Y  | Y       | General |
| Carangidae         | Caranx bartholomaei        | Predator         | Y       | N | Y  | Y  | N          | Y  | Y  | Y       | General |
| Carangidae         | Caranx crysos              | Predator         | Y       | N | N  | N  | N          | N  | Y  | Y       | General |
| Carangidae         | Caranx latus               | Predator         | N       | N | N  | N  | N          | Y  | N  | N       | General |
| Chaetodontidae     | Chaetodon capistratus      | Omnivore         | Y       | Y | Y  | Y  | Y          | Y  | Y  | Y       | General |
| Chaetodontidae     | Chaetodon ocellatus        | Omnivore         | Y       | N | Y  | Y  | Y          | Y  | Y  | Y       | General |
| Chaetodontidae     | Chaetodon sedentarius      | Omnivore         | N       | N | N  | Y  | Y          | Y  | N  | Y       | Special |
| Chaetodontidae     | Chaetodon striatus         | Omnivore         | N       | Y | Y  | N  | N          | Y  | Y  | Y       | General |
| Diodontidae        | Chilomycterus schoepfi     | Omnivore         | N       | N | N  | N  | Y          | Y  | N  | N       | General |
| Diodontidae        | Diodon holocanthus         | Omnivore         | Y       | N | N  | N  | N          | N  | Y  | Y       | General |
| Diodontidae        | Diodon hystrix             | Omnivore         | N       | N | N  | N  | Y          | N  | N  | N       | General |
| Echeneidae         | Echeneis naucrates         | Omnivore         | N       | N | N  | N  | Y          | N  | N  | N       | General |
| Ephippidae         | Chaetodipterus faber       | Omnivore         | N       | N | Y  | Y  | N          | Y  | Y  | Y       | General |
| Ginglymostomatidae | Ginglymostoma cirratum     | Predator         | N       | Y | N  | N  | Y          | N  | Y  | Y       | General |
| Gobiidae           | Gnatholepis thompsoni      | Omnivore         | N       | N | N  | N  | N          | Y  | N  | Y       | General |
| Gobiidae           | Coryphopterus tortugae     | Omnivore         | N       | Y | Y  | Y  | N          | Y  | Y  | Y       | Special |
| Gobiidae           | Elacatinus oceanops        | Omnivore         | N       | N | N  | N  | N          | Y  | Y  | Y       | Special |
| Grammatidae        | Gramma loreto              | Omnivore         | Y       | N | N  | N  | N          | N  | N  | N       | Special |
| Haemulidae         | Anisotremus surinamensis   | Invertivore      | N       | N | N  | N  | Y          | Y  | Y  | Y       | Special |
| Haemulidae         | Anisotremus virginicus     | Invertivore      | Y       | Y | Y  | Y  | Y          | Y  | Y  | Y       | Special |
| Haemulidae         | Haemulon album             | Invertivore      | Y       | Y | Y  | Y  | Y          | Y  | Y  | Y       | General |
| Haemulidae         | Haemulon aurolineatum      | Invertivore      | N       | N | N  | N  | Y          | Y  | Y  | Y       | Special |
| Haemulidae         | Haemulon carbonarium       | Invertivore      | N       | N | N  | N  | N          | Y  | Y  | N       | Special |
| Haemulidae         | Haemulon chrysargyreum     | Invertivore      | Y       | N | Y  | N  | N          | Y  | Y  | Y       | General |
| Haemulidae         | Haemulon flavolineatum     | Invertivore      | Y       | N | Y  | Y  | Y          | Y  | Y  | Y       | General |
| Haemulidae         | Haemulon melanurum         | Invertivore      | N       | N | N  | N  | N          | Y  | Y  | N       | Special |
| Haemulidae         | Haemulon macrostomum       | Invertivore      | N       | N | N  | N  | N          | N  | N  | Y       | Special |
| Haemulidae         | Haemulon parra             | Invertivore      | N       | N | Y  | N  | Y          | N  | Y  | Y       | General |
| Haemulidae         | Haemulon plumierii         | Invertivore      | Y       | Y | Y  | Y  | Y          | Y  | Y  | Y       | General |
| Haemulidae         | Haemulon sciurus           | Invertivore      | Y       | Y | Y  | Y  | Y          | Y  | Y  | Y       | General |
| Labridae           | Bodianus rufus             | Omnivore         | N       | N | Y  | N  | Y          | Y  | Y  | Y       | Special |
| Holocentridae      | Holocentrus adscensionis   | Omnivore         | N       | N | N  | N  | N          | Y  | N  | Y       | Special |
| Kyphosidae         | Kyphosus incisor/sectatrix | Herbivore        | N       | Y | N  | Y  | Y          | N  | Y  | Y       | Special |
| Labridae           | Clepticus parrae           | Omnivore         | N       | N | N  | N  | N          | Y  | N  | N       | Special |
| Labridae           | Halichoeres bivittatus     | Omnivore         | Y       | Y | Y  | Y  | Y          | Y  | Y  | Y       | General |
| Labridae           | Halichoeres garnoti        | Omnivore         | Y       | Y | Y  | Y  | Y          | Y  | Y  | Y       | General |
| Labridae           | Halichoeres maculipinna    | Omnivore         | Y       | Y | Y  | Y  | Y          | Y  | Y  | Y       | Special |
| Labridae           | Halichoeres caudalis       | Omnivore         | N       | N | N  | N  | N          | Y  | N  | N       | Special |
| Labridae           | Halichoeres poeyi          | Omnivore         | N       | Y | Y  | Y  | Y          | Y  | Y  | Y       | General |
| Labridae           | Halichoeres radiatus       | Omnivore         | Y       | Y | Y  | Y  | Y          | Y  | Y  | Y       | General |
| Labridae           | Lachnolaimus maximus       | Predator         | Y       | Y | Y  | Y  | Y          | Y  | Y  | Y       | General |
| Labridae           | Thalassoma bifasciatum     | Omnivore         | Y       | Y | Y  | Y  | Y          | Y  | Y  | Y       | Special |

|               |                              |           |   |   |   |   |   |   |   |   |          |
|---------------|------------------------------|-----------|---|---|---|---|---|---|---|---|----------|
| Labridae      | Xyrichtys martinicensis      | Omnivore  | N | N | N | N | N | Y | N | Y | Special  |
| Lutjanidae    | Lutjanus analis              | Predator  | N | N | N | Y | N | N | N | Y | General  |
| Lutjanidae    | Lutjanus apodus              | Predator  | Y | Y | N | Y | Y | Y | Y | Y | General  |
| Lutjanidae    | Lutjanus griseus             | Predator  | N | N | N | N | N | N | Y | Y | General  |
| Lutjanidae    | Lutjanus jocu                | Predator  | Y | N | N | Y | Y | Y | Y | Y | General  |
| Lutjanidae    | Lutjanus synagris            | Predator  | N | N | N | Y | N | Y | Y | N | General  |
| Lutjanidae    | Ocyurus chrysurus            | Predator  | Y | Y | Y | Y | Y | Y | Y | Y | General  |
| Monacanthidae | Cantherhines macrocerus      | Omnivore  | N | N | N | N | N | N | Y | N | Special  |
| Monacanthidae | Cantherhines pullus          | Omnivore  | N | N | N | N | Y | Y | Y | Y | Special  |
| Monacanthidae | Monacanthus tuckeri          | Omnivore  | N | N | N | Y | Y | N | N | Y | General  |
| Monacanthidae | Aluterus scriptus            | Omnivore  | N | N | N | Y | N | Y | Y | Y | Special  |
| Mullidae      | Mulloidichthys martinicus    | Omnivore  | N | N | N | N | N | N | N | Y | General  |
| Mullidae      | Pseudupeneus maculatus       | Omnivore  | N | N | Y | Y | Y | Y | Y | Y | General  |
| Muraenidae    | Gymnothorax moringa          | Predator  | N | N | N | N | N | N | Y | N | General  |
| Ostraciidae   | Lactophrys bicaudalis        | Omnivore  | N | N | Y | Y | N | Y | N | N | General  |
| Ostraciidae   | Lactophrys triqueter         | Omnivore  | N | N | Y | Y | Y | Y | Y | Y | Special  |
| Ostraciidae   | Acanthostracion quadricornis | Omnivore  | Y | N | N | N | Y | N | Y | Y | General  |
| Pomacanthidae | Holacanthus bermudensis      | Omnivore  | N | Y | Y | Y | N | N | N | Y | Special  |
| Pomacanthidae | Holacanthus ciliaris         | Omnivore  | Y | N | N | N | N | N | Y | Y | Special  |
| Pomacanthidae | Holacanthus tricolor         | Omnivore  | N | N | Y | N | N | Y | Y | Y | Special  |
| Pomacanthidae | Pomacanthus arcuatus         | Omnivore  | Y | Y | Y | Y | Y | Y | Y | Y | General  |
| Pomacanthidae | Pomacanthus paru             | Omnivore  | Y | Y | Y | Y | Y | Y | Y | Y | General  |
| Pomacentridae | Abudefduf saxatilis          | Omnivore  | N | N | Y | N | Y | Y | Y | Y | Special  |
| Pomacentridae | Chromis cyanea               | Omnivore  | N | N | N | N | N | N | Y | Y | Special  |
| Pomacentridae | Microspathodon chrysurus     | Herbivore | N | Y | Y | N | Y | Y | Y | Y | Special  |
| Pomacentridae | Stegastes diencaeus          | Herbivore | Y | N | N | N | Y | N | N | N | Special  |
| Pomacentridae | Stegastes adustus            | Herbivore | N | N | N | N | Y | Y | Y | Y | Special  |
| Pomacentridae | Stegastes leucostictus       | Herbivore | N | Y | Y | Y | Y | Y | Y | Y | General  |
| Pomacentridae | Stegastes partitus           | Herbivore | Y | Y | Y | Y | Y | Y | Y | Y | Special  |
| Pomacentridae | Stegastes planifrons         | Herbivore | N | N | Y | N | N | N | N | N | Special  |
| Pomacentridae | Stegastes variabilis         | Herbivore | N | Y | Y | Y | Y | Y | Y | Y | Special  |
| Scaridae      | Scarus coelestinus           | Herbivore | N | N | Y | Y | N | Y | Y | Y | Special  |
| Scaridae      | Scarus coeruleus             | Herbivore | N | N | N | Y | Y | Y | Y | Y | General  |
| Scaridae      | Scarus guacamaia             | Herbivore | Y | N | N | N | Y | Y | Y | Y | General  |
| Scaridae      | Scarus iseri                 | Herbivore | Y | Y | Y | Y | Y | Y | Y | Y | General  |
| Scaridae      | Scarus taeniopterus          | Herbivore | Y | N | Y | Y | N | Y | Y | N | Special  |
| Scaridae      | Scarus vetula                | Herbivore | N | N | Y | N | Y | N | Y | N | Special  |
| Scaridae      | Sparisoma atomarium          | Herbivore | N | N | N | Y | Y | N | Y | Y | General  |
| Scaridae      | Sparisoma aurofrenatum       | Herbivore | Y | Y | Y | Y | Y | Y | Y | Y | General  |
| Scaridae      | Sparisoma chrysopteron       | Herbivore | Y | Y | N | N | Y | Y | Y | Y | General  |
| Scaridae      | Sparisoma radians            | Herbivore | N | N | N | N | Y | N | Y | N | General  |
| Scaridae      | Sparisoma rubripinne         | Herbivore | Y | Y | Y | Y | Y | Y | Y | Y | General  |
| Scaridae      | Sparisoma viride             | Herbivore | Y | Y | Y | Y | Y | Y | Y | Y | Speciali |
| Sciaenidae    | Pareques acuminatus          | Omnivore  | N | N | N | N | N | Y | Y | Y | General  |
| Serranidae    | Cephalopholis cruentata      | Predator  | N | N | N | N | N | Y | Y | Y | General  |
| Serranidae    | Epinephelus guttatus         | Predator  | N | N | N | N | N | Y | N | N | Special  |
| Serranidae    | Hypoplectrus puella          | Predator  | Y | N | N | N | N | Y | N | N | General  |
| Serranidae    | Mycteroperca bonaci          | Predator  | N | N | N | N | N | Y | Y | Y | General  |
| Serranidae    | Serranus baldwini            | Predator  | N | N | N | N | N | Y | Y | N | General  |
| Serranidae    | Serranus tigrinus            | Predator  | N | Y | Y | N | Y | Y | Y | Y | General  |
| Sparidae      | Calamus bajonado             | Omnivore  | N | N | Y | N | N | N | Y | Y | General  |
| Sparidae      | Calamus calamus              | Omnivore  | N | Y | Y | Y | Y | Y | Y | Y | General  |
| Sparidae      | Calamus nodosus              | Omnivore  | N | N | N | N | N | N | N | Y | General  |
| Sparidae      | Calamus pennatula            | Omnivore  | N | N | N | N | Y | N | N | N | General  |
| Sphyraenidae  | Sphyraena barracuda          | Predator  | Y | Y | N | N | Y | Y | Y | Y | General  |
| Sphyrnidae    | Sphyrna lewini               | Predator  | N | N | N | N | N | N | Y | N | General  |
| Syngnathinae  | Cosmocampus elucens          | Omnivore  | N | Y | N | N | N | N | N | N | Special  |

|                |                          |          |   |   |   |   |   |   |   |   |         |
|----------------|--------------------------|----------|---|---|---|---|---|---|---|---|---------|
| Tetraodontidae | Canthigaster jamestyleri | Omnivore | N | N | N | N | Y | Y | N | N | Special |
| Tetraodontidae | Canthigaster rostrata    | Omnivore | N | N | N | Y | N | N | Y | Y | Special |
| Urotrygonidae  | Urobatis jamaicensis     | Predator | N | N | Y | N | N | Y | Y | N | General |

**Table S2.** Percent presence of generalist versus specialist species observed for the four artificial and four natural shelter types for each functional group. Artificial structures = soft coral mimic (SC), control structure (C), boulder coral mimic (BC) and elkhorn coral mimic (EC). Natural structures = sea rods (SR), dead corals (DC), infected diseased corals (IC), healthy corals (HC).

| Functional Group | Habitat Use | # Species | % Species Artificial Structure |      |      |      | % Species Natural Structure |      |      |      |
|------------------|-------------|-----------|--------------------------------|------|------|------|-----------------------------|------|------|------|
|                  |             |           | SC                             | C    | BC   | EC   | SR                          | DC   | IC   | HC   |
| Herbivores       | Generalist  | 12        | 66.7                           | 66.7 | 58.3 | 75.0 | 100                         | 83.3 | 100  | 91.7 |
|                  | Specialists | 11        | 36.4                           | 45.4 | 72.7 | 54.5 | 72.7                        | 63.6 | 81.8 | 63.7 |
| Omnivores        | Generalists | 25        | 36.0                           | 36.0 | 56.0 | 52.0 | 64.0                        | 64.0 | 64.0 | 80.0 |
|                  | Specialists | 23        | 17.4                           | 21.7 | 34.8 | 34.8 | 34.8                        | 69.6 | 60.7 | 73.9 |
| Invertivores     | Generalists | 6         | 83.3                           | 50.0 | 100  | 66.7 | 83.3                        | 83.3 | 100  | 100  |
|                  | Specialists | 6         | 16.6                           | 16.6 | 16.6 | 16.6 | 50.0                        | 83.3 | 83.3 | 66.7 |
| Predators        | Generalists | 24        | 38.1                           | 28.6 | 38.1 | 42.8 | 42.8                        | 85.7 | 90.4 | 76.1 |
|                  | Specialists | 2         | 100                            | 0    | 0    | 0    | 0                           | 100  | 0    | 0    |

Note: A comparison the mean % presence for each functional group / structure type combination indicates generalist species have a mean percent presence of 68.8 +/- 3.9% and specialist species have a mean percent presence of 43.3 +/- 5.6% (paired t-test: df = 31, t = 4.862, p < 0.0001).
